# Supplementary material for: Factors Associated With a Six-Month Return to Emergency Services Among Child and Adolescent Psychiatric Patients
Source: Atypon-hosted journal article supplement (doi:10.1176/ps.2007.58.11.1489), 2007-11-01
Supplement: pss_58_11_1489_01.pdf [file pss_58_11_1489_01.pdf]

SUPPLEMENT

**Table 2**

Factors associated with six-month return to emergency services,  
Baltimore City residents (N=406)

|                                                          | <b>Adjusted</b><br><i>(Pseudo R<sup>2</sup></i><br><i>= 0.17)</i> | <b>CI</b>   |
|----------------------------------------------------------|-------------------------------------------------------------------|-------------|
| <b>First age quintile</b> (referent – 1 <sup>st</sup> )  | .99                                                               | .46 – 2.09  |
| <b>Third age quintile</b> (referent – 1 <sup>st</sup> )  | 1.15                                                              | .47 – 2.79  |
| <b>Fourth age quintile</b> (referent – 1 <sup>st</sup> ) | .54                                                               | .21 – 1.40  |
| <b>Fifth age quintile</b> (referent – 1 <sup>st</sup> )  | .74                                                               | .30 – 1.81  |
| <b>African American</b>                                  | 2.88                                                              | 1.19 – 6.91 |
| <b>Medical Assistance</b>                                | 1.74                                                              | .30 – 1.81  |
| <b>DSS Involvement</b>                                   | 1.75                                                              | .98 – 3.34  |
| <b>In current treatment</b>                              | 2.45                                                              | 1.19 – 5.03 |
| <b>History of hospitalization</b>                        | 2.70                                                              | 1.41 – 5.17 |
| <b>Hospitalized at visit</b>                             | 1.23                                                              | .48 – 3.14  |
| <b>More than 2 diagnoses</b>                             | 2.09                                                              | 1.11 – 3.92 |
| <b>Suicidal thoughts/behavior</b>                        | 1.92                                                              | .99 – 3.73  |
| <b>Disruptive Behavior</b>                               | 2.32                                                              | .95 – 5.69  |
| <b>Inpatient disposition x<br/>Disruptive Behavior</b>   | .28                                                               | .09 - .92   |

Note: The adjusted model includes age and insurance status as covariates; these variables were dropped from the unadjusted model, due to statistical non-significance.
